# Supplementary material for: Natural glycyrrhizic acid: improving stress relaxation rate and glass transition temperature simultaneously in epoxy vitrimers
Source: Royal Society of Chemistry journal article supplement (doi:10.1039/d1gc01274f), 2021-01-01
Supplement: d1gc01274f3.pdf [file d1gc01274f3.pdf]

## Electronic Supplementary Information

# Natural glycyrrhizic acid: improving stress relaxation rate and glass transition temperature simultaneously in epoxy vitrimers

*Jianqiao Wu,<sup>a</sup> Liang Gao,<sup>c</sup> Zhongkai Guo,<sup>a</sup> Hao Zhang,<sup>a</sup> Baoyan Zhang,<sup>c</sup> Jun Hu<sup>\*a</sup> and Min-Hui Li<sup>\*a,b</sup>*

<sup>a</sup>Beijing Advanced Innovation Center for Soft Matter Science and Engineering, Beijing University of Chemical Technology, North Third Ring Road 15, Chaoyang District, Beijing 100029, China.

<sup>b</sup>Chimie ParisTech, PSL Université, CNRS, Institut de Recherche de Chimie Paris, UMR8247, 11 rue Pierre et Marie Curie, Paris 75005, France.

<sup>c</sup>Department of Resin & Prepreg, AVIC Manufacturing Technology Institute Composite Technology Center, Shijun Road 1, Shunyi District, Beijing 101300, China.

### **\*Corresponding Authors**

Email: [jhu@mail.buct.edu.cn](mailto:jhu@mail.buct.edu.cn) (Jun Hu), [min-hui.li@chimieparistech.psl.eu](mailto:min-hui.li@chimieparistech.psl.eu) (Min-Hui Li)

The supporting information includes 14 pages, 5 tables and 9 figures.

# Contents

|                                                                                                                                                   |          |
|---------------------------------------------------------------------------------------------------------------------------------------------------|----------|
| 1. Characterization .....                                                                                                                         | Page S3  |
| 2. DSC curves of DGEAC, GL and SA.....                                                                                                            | Page S6  |
| 3. Thermal stability of DGEAC/SA/GL networks .....                                                                                                | Page S6  |
| 4. FTIR spectra analysis for curing reactions .....                                                                                               | Page S7  |
| 5. DSC curves of DGEAC/SA/GL networks after curing reactions. ....                                                                                | Page S7  |
| 6. Gel contents and swelling tests of DGEAC/SA/GL networks .....                                                                                  | Page S8  |
| 7. Storage modulus of DGEAC/SA/GL networks.....                                                                                                   | Page S8  |
| 8. Tensile test of DGEAC/SA/GL networks.....                                                                                                      | Page S9  |
| 9. Stress relaxation of DGEAC/SA/GL networks .....                                                                                                | Page S10 |
| 10. Details of vitrimer samples in Fig. 3d. ....                                                                                                  | Page S11 |
| 11. Topology freezing transition temperature of DGEAC/SA/GL networks .....                                                                        | Page S12 |
| 12. Comparison of welding, reprocessing, repairing, recycling and chemical degrading of V4 with other reported epoxy vitrimers based on TERs..... | Page S13 |

## 1. Characterization.

*Differential scanning calorimeter (DSC) test:* Differential scanning calorimeter (DSC, TA-DSC 250) was used to investigate the curing behavior. The samples (~5 mg) were sealed in aluminum crucibles, and scanned at a heating rate of 5°C/min for curing samples and raw materials. For cured networks, the samples (~5 mg) were heated from -40°C to 200°C at a heating rate of 20°C/min.

*Thermal stability test:* Thermal stability was measured by using a thermogravimetric analyzer (TGA, TA-Q50). Samples (~5 mg) were loaded into alumina crucibles and scanned from room temperature to 700°C at a heating rate of 10°C/min under nitrogen atmosphere.

*Fourier transform infrared spectroscopy (FTIR):* Fourier transform infrared spectroscopy (FTIR) spectra were recorded on a spectrophotometer (Nicolet iS5). The sample was grinded with potassium bromide (KBr, 100 mg) in a mortar, and the mixture was compressed into a disk using a mould. All samples were scanned from 4000 to 400 cm<sup>-1</sup>.

*Gel content tests:* Dry sample (~30 mg,  $m_0$ ) was immersed in 5 mL of dichloromethane (DCM) for 20 h. After 20 h, the samples were dried in a vacuum oven at 70°C and then weighted ( $m_1$ ). The gel content was calculated according to the following equation:

$$\text{Gel contents (\%)} = \frac{m_1}{m_0} \times 100\% \quad (\text{S1})$$

*Swelling tests:* The swelling ratio was measured by immersing the sample (~30 mg,  $m_0$ ) in dichloromethane (DCM) at room temperature. When the absorption reached equilibrium, the sample was taken out of the solution. The excessive surface solvent was removed with a filter paper, and the swollen sample was weighted ( $m_1$ ). The swelling ratio was calculated according to the following equation:

$$\text{Swelling ratio (\%)} = \frac{m_1 - m_0}{m_0} \times 100\% \quad (\text{S2})$$

*Dynamic mechanical analysis:* Dynamic mechanical properties were measured by using a dynamic mechanical analyzer (DMA, TA-Q850) in tension mode. The sample with a dimension of 30 mm × 5 mm × 1 mm was scanned from -50 to 200°C at a heating rate of 5°C/min. The amplitude was set at 10 μm and the frequency was 1 Hz.

*Tensile test:* Tensile test was measured by a universal testing machine (MTS-CMT4304) according to ASTM D882 standard. Dumbbell-shaped samples were used for the test. The crosshead speed was 2 mm per min, and the gauge length was 17 ± 2 mm. At least five samples were tested for each vitrimer system.

*Stress relaxation test:* Stress relaxation was measured by using DMA (TA-Q800). The sample dimension was 30 mm × 5 mm × 1 mm. The sample was heated to the appointed temperature and soaked for 15 min with a static force (0.001 N). After that, an instantaneous strain of 2% was forced to the material. The stress and modulus was detected for several hours until it achieved equilibrium.

*Thermodilatometry test:* Thermodilatometry was measured using DMA (TA-Q850) in controlled force tension mode. The sample dimension was 30 mm × 5 mm × 1 mm. A constant force was added to stretch material which made the stress constant at 2 kPa. Sample was heated to 250°C as a heating rate of 5°C/min. The derivative of each curve was used to obtain the  $T_{\text{mall}}$  value.

*Welding test:* Welding property was studied using an oven at 130°C for 1 h. Two pieces were assembled into an “L” pattern with the help of EG at the interface. A glass slide was added on the sample to offer a small pressure.

*Reprocessing test:* Reprocessing property was studied using a long medicine spoon to fix in an oven at 130°C for 1 h.

*Repairing test:* Repairing property was studied using an optical microscope (UPT200I). The sample was cracked using a knife and repaired at an oven at 130°C. A drop of EG was added on the interface of each sample to help the repairing process. A glass slide was added on the sample to offer a small pressure.

*Physical recycling:* Physical recycling properties were studied using tensile test similar with the original samples. The sample pieces were gathered and put into a mould on a press vulcanizer at 130°C at 10 tons pressure to form two new films. The new films were used to prepare dumbbell-shaped samples with similar size to original ones.

*Chemical degradable test:* The chemical degradable property was investigated by using EG (5 mL) in vials at 130°C. The sample was cut into ~30 mg rectangular piece, and then immersed in EG at 130°C in an oven.

## 2. DSC curves of DGEAC, GL and SA.

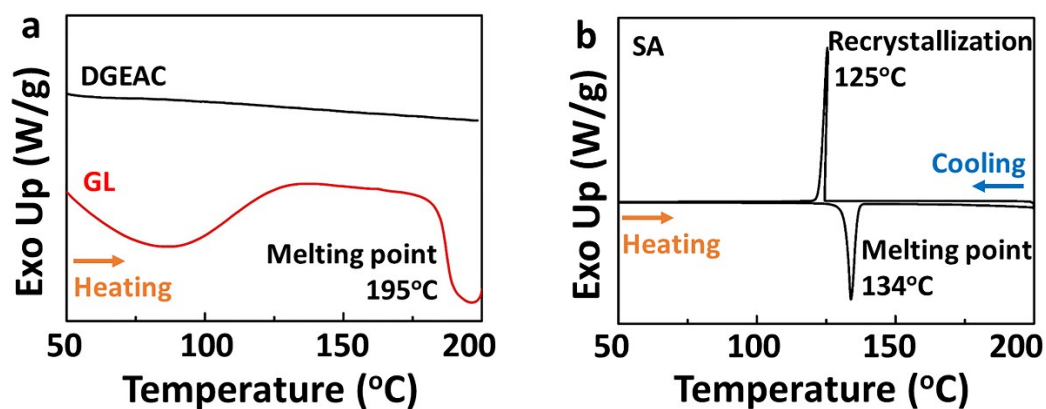

**Fig. S1** (a) DSC curves of DGEAC and GL at a heating rate 5°C/min. (b) DSC curves of SA at a heating/cooling rate 5°C/min.

## 3. Thermal stability of DGEAC/SA/GL networks.

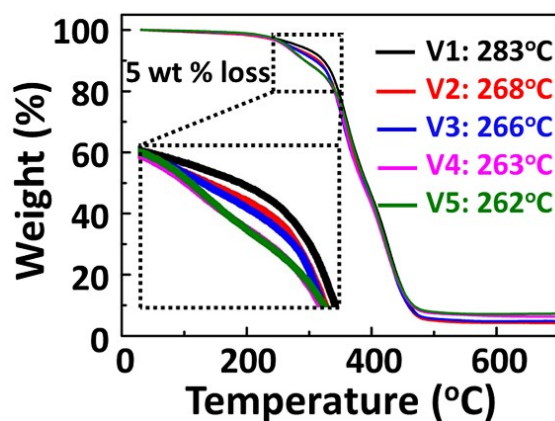

**Fig. S2** TGA results of DGEAC/SA/GL networks after curing at N<sub>2</sub> atmosphere. The heating rate was 10°C/min.

#### 4. FTIR spectra analysis for curing reactions.

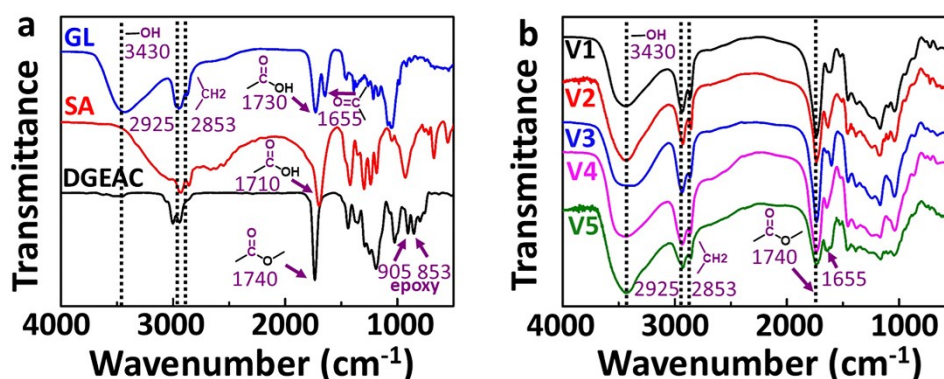

**Fig. S3** (a) FTIR spectra of DGEAC, SA, and GL monomer ranging from 500 to 4000 cm<sup>-1</sup>. The signals at 1740 and 905/853 cm<sup>-1</sup> were assigned to ester bonds and epoxy groups from DGEAC, and the signals at 2925/2853 and 1710 cm<sup>-1</sup> were assigned to methylene and carboxyl groups from SA, while the signals at 3430, 2925/2853, 1730 and 1655 cm<sup>-1</sup> were assigned to hydroxyl, methylene, carboxyl and ketone groups from GL. (b) FTIR spectra of DGEAC/SA/GL (V1 to V5) ranging from 500 to 4000 cm<sup>-1</sup>. The signals at 3430, 2925/2928, 1740, and 1655 cm<sup>-1</sup> were assigned to hydroxyl groups, methylene groups, ester bonds and ketone groups, respectively.

#### 5. DSC curves of DGEAC/SA/GL networks after curing reactions.

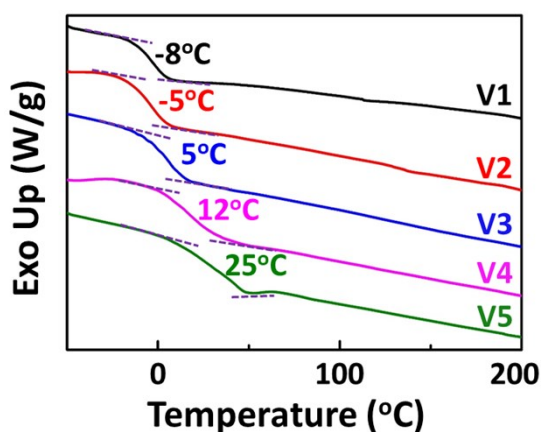

**Fig. S4** DSC curves of DGEAC/SA/GL networks (V1, V2, V3, V4, V5) at a heating rate 20°C/min.

## 6. Gel contents and swelling tests of DGEAC/SA/GL networks.

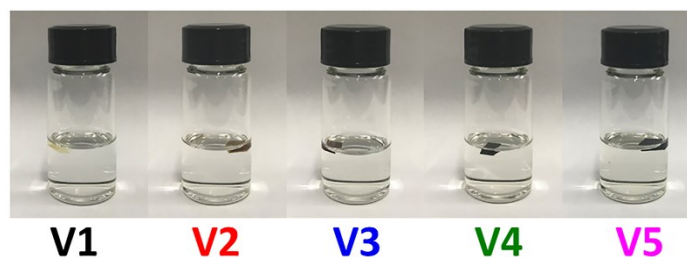

Fig. S5 Digital photo of gel contents and swelling tests after 20 h in DCM.

Table S1. Gel content and swelling ratio of DGEAC/SA/GL networks in DCM.

|                    | V1       | V2       | V3       | V4       | V5       |
|--------------------|----------|----------|----------|----------|----------|
| Gel Content (%)    | 90 ± 1.8 | 92 ± 1.8 | 90 ± 0.9 | 94 ± 2.0 | 99 ± 1.0 |
| Swelling Ratio (%) | 74 ± 4.1 | 71 ± 2.5 | 63 ± 2.5 | 60 ± 1.9 | 61 ± 0.4 |

## 7. Storage modulus of DGEAC/SA/GL networks.

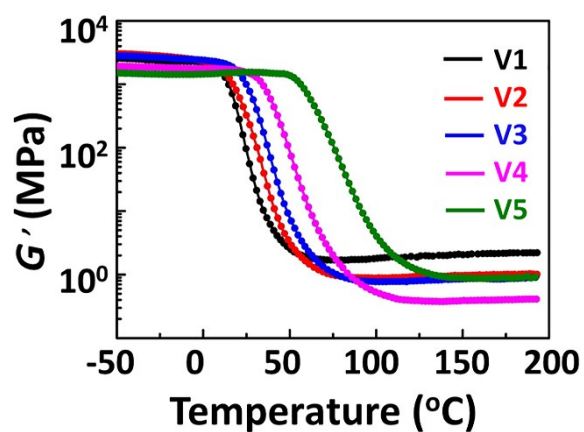

Fig. S6 Storage modulus of DGEAC/SA/GL networks using DMA at a heating rate of 5°C/min.



## 8. Tensile test of DGEAC/SA/GL networks.

**Table S2.** Tensile strength and modulus of DGEAC/SA/GL networks.

| Sample                     | Strength (MPa)   | Modulus (MPa)      |
|----------------------------|------------------|--------------------|
| V1                         | $0.56 \pm 0.02$  | $2.37 \pm 0.27$    |
| V2                         | $0.55 \pm 0.03$  | $2.68 \pm 0.11$    |
| V3                         | $0.63 \pm 0.07$  | $17.20 \pm 3.29$   |
| V4                         | $2.52 \pm 0.24$  | $147.67 \pm 14.59$ |
| V5                         | $11.28 \pm 1.00$ | $542.26 \pm 63.65$ |
| Recycled V4 <sup>[a]</sup> | $1.48 \pm 0.59$  | $83.81 \pm 0.57$   |
| Recycled V4 <sup>[b]</sup> | $2.44 \pm 0.35$  | $131.96 \pm 13.86$ |

[a] Recycled V4 by 10 tons pressure at 130°C for 1 h. [b] Recycled V4 by 10 tons pressure at 130°C for 5 h.

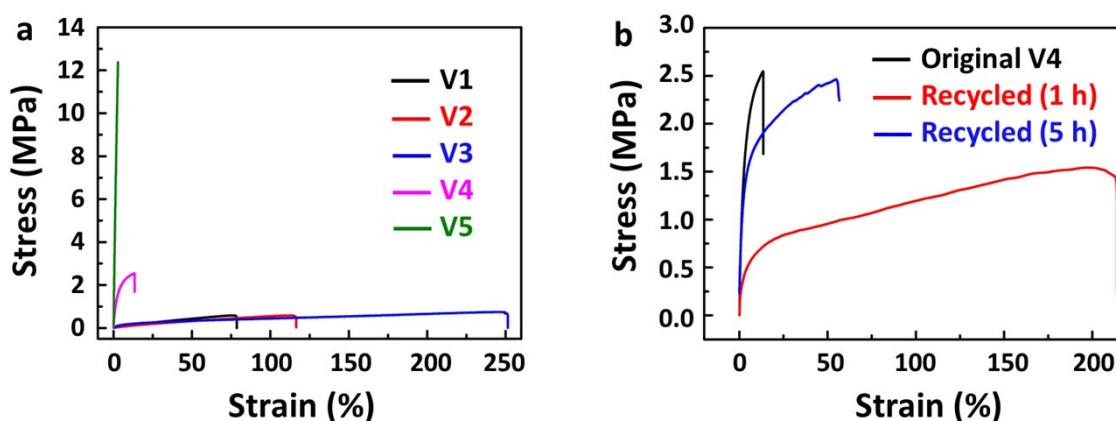

**Fig. S7** (a) Stress-strain curves of DGEAC/SA/GL networks (V1 to V5) from tensile tests. (b) Stress-strain curves of original V4 and recycled V4 from tensile tests. The red line and blue line represented recycled sample after 130°C for 1 h and 5 h, respectively.

### 9. Stress relaxation of DGEAC/SA/GL networks.

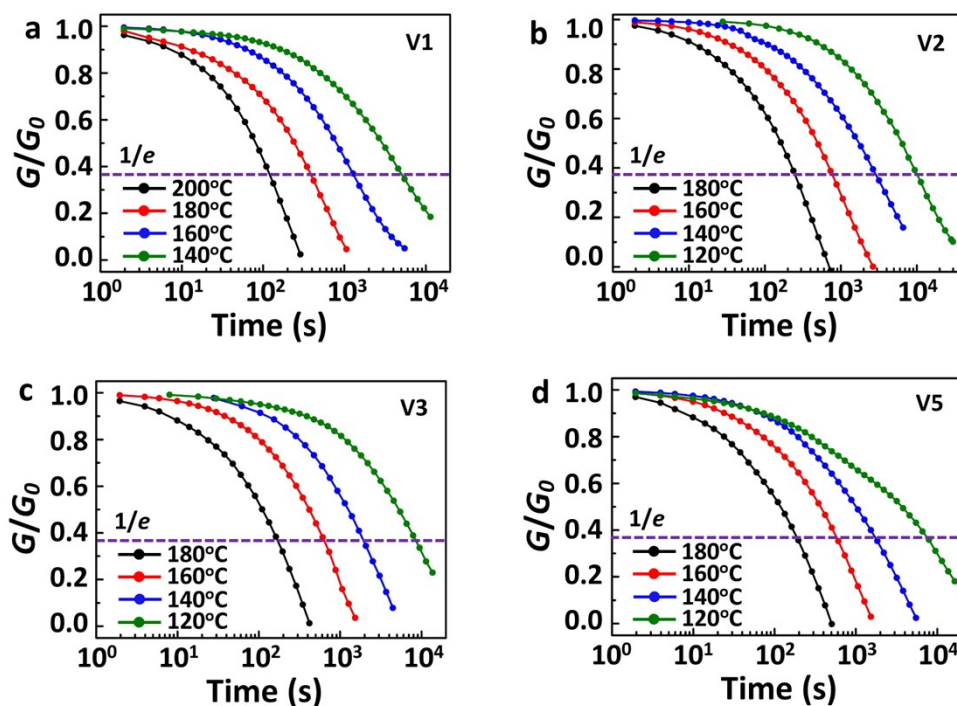

**Fig. S8** Stress relaxation of DGEAC/SA/GL networks (V1, V2, V3 and V5) at different temperatures using DMA tension mode with a strain of 2%.

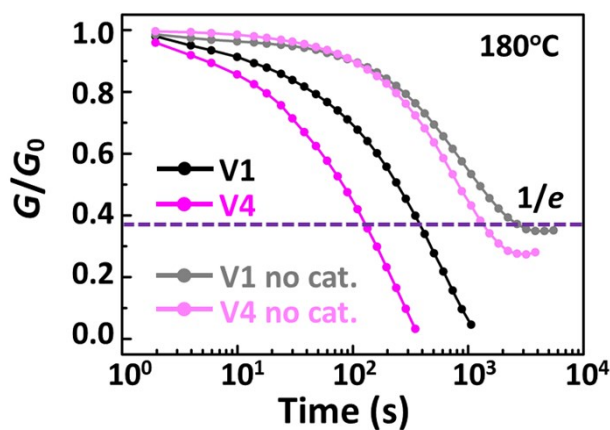

**Fig. S9** Stress relaxation of V1 and V4 with and without catalyst TBD at 180°C using DMA tension mode with a strain of 2%.

## 10. Details of vitrimer samples in Fig. 3d.

**Table S3.** Detail of vitrimer samples in Fig. 3d.

| Entry | Sample                            | Catalyst contents                                                                        | Reference |
|-------|-----------------------------------|------------------------------------------------------------------------------------------|-----------|
| 1     | 100H 5CAT<br>75H 5CAT<br>60H 5CAT | TBD: 5 mol% of the epoxy groups                                                          | [28]      |
| 2     | CL-PE-310                         | Zn(OAc) <sub>2</sub> : 20 mol% of the carboxyl groups                                    | [48]      |
| 3     | Single ester vitrimer             | TBD: 5 mol% of the carboxyl groups                                                       | [46]      |
| 4     | Cross-linked PDMS                 | Zn(OAc) <sub>2</sub> : 5 mol% of the carboxyl groups                                     | [42]      |
| 5     | Epoxy 1                           | Zn(Ac) <sub>2</sub> : 5 mol% of the epoxy groups                                         | [26]      |
| 6     | Nanoclay-CANs                     | Zn(Ac) <sub>2</sub> : 2.24%                                                              | [23]      |
| 7     | ESO/GL (R = 0.5, TBD 5 mol%)      | TBD: 5 mol% of the carboxyl groups                                                       | [41]      |
| 8     | HBE-2/SA-CAT                      | Zn(acac) <sub>2</sub> : 5 mol% of the carboxyl groups                                    | [32]      |
| 9     | ESO-FPA <sub>1.0</sub>            | Zn(acac) <sub>2</sub> : 3.33 mol% of the carboxyl groups                                 | [33]      |
| 10    | PAB-POSS vitrimer                 | Zn(Ac) <sub>2</sub> : 10 mol% of the carboxyl groups of poly(acrylonitrile-co-butadiene) | [43]      |

## 11. Topology freezing transition temperature of DGEAC/SA/GL networks.

The topology freezing transition temperature ( $T_v$ ) of V4 was calculated as the following process:

Initially, equation S3 was obtained from Arrhenius law as shown in Fig. 3b:

$$y = 11.42x - 20.37 \quad (R = 0.9997) \quad (S3)$$

The Maxwell relation (equation S4) below is used to calculate  $T_v$  which is defined as the point at the viscosity  $\eta = 10^{12}$  Pa S. The shear modulus  $G$  was estimated from tensile modulus ( $E'$ ) as measured by DMA with the relation (equation S5).  $E'$  of the sample was calculated as the average modulus at temperature ranging from 150 to 180°C from the modulus-temperature curves (Fig. S6). The average plateau modulus of the sample is 0.39 MPa. The Poisson's ratio  $\nu$  is chosen as the value 0.5, which is usually used for rubbers.

$$\eta = G\tau^* \quad (S4)$$

$$G = \frac{E'}{2(1 + \nu)} \quad (S5)$$

Consequently,

$$G = 0.39 / (2 \times 1.5) = 1.3 \times 10^5 \text{ Pa},$$

$$\tau^* = \eta / G = 10^{12} / (1.3 \times 10^5) = 7.65 \times 10^6 \text{ s},$$

$$\ln \tau^* = \ln (7.65 \times 10^6) = 15.85.$$

$$\text{Using equation S3, } 15.85 = 11.42x - 20.37, x = 3.17$$

$$\text{Thereby, } 1000/T_v = 3.17, T_v = 315.46 \text{ K} = 42^\circ\text{C}.$$

According to the above calculation, the  $T_v$  of DGEAC/SA/GL networks (V1 to V5) were obtained and listed in Table S3.

**Table S4.** The  $T_v$  of DGEAC/SA/GL networks.

| Sample     | V1 | V2 | V3 | V4 | V5 |
|------------|----|----|----|----|----|
| $T_v$ (°C) | 73 | 54 | 52 | 42 | 49 |

**12. Comparison of welding, reprocessing, repairing, recycling and chemical degrading of V4 with other reported epoxy vitrimers based on TERs.**

**Table S5.** Comparison of welding, reprocessing, repairing, recycling and chemical degrading of V4 with other reported epoxy vitrimers based on TERs.

| Entry | Sample                                                                      | Welding                   | Reprocessing              | Repairing                  | Recycling                 | Chemical degrading                                            | Reference               |
|-------|-----------------------------------------------------------------------------|---------------------------|---------------------------|----------------------------|---------------------------|---------------------------------------------------------------|-------------------------|
| 1     | Epoxy CANs<br>(5 mol % catalyst)                                            |                           |                           |                            |                           | 180°C<br>(160 min)                                            | [S1]                    |
| 2     | Epoxy CANs<br>(5 mol % catalyst)                                            | 180°C<br>(180 min)        |                           | 180°C<br>(180 min)         | 180°C<br>(220 min)        | 180°C<br>(190 min)                                            | [S2]                    |
| 3     | Epoxy CANs<br>(7 mol % catalyst)                                            | 180°C<br>(180 min)        |                           |                            | 180°C<br>(220 min)        | 140°C<br>(440 min)<br>180°C<br>(190 min)<br>220°C<br>(60 min) | [S2]                    |
| 4     | Nanoclay-CANs                                                               |                           |                           |                            |                           | 180°C<br>(360 min)                                            | [S3]                    |
| 5     | ESO/GL<br>(R = 0.5, TBD 5 mol %)                                            | 200°C<br>(15 min)         |                           | 200°C<br>(60 min)          | 200°C<br>(135 min)        | 180°C<br>(720 min)                                            | [S4]                    |
| 6     | Cross-linked PDMS                                                           |                           |                           |                            | 180°C<br>(40 min)         | 180°C                                                         | [S5]                    |
| 7     | TEP-1                                                                       | 220°C<br>(60 min)         |                           | 220°C<br>(5 min)           |                           |                                                               | [S6]                    |
| 8     | HBE-1/SA                                                                    | 150°C<br>(60 min)         |                           | 150°C<br>(30 min)          |                           |                                                               | [S7]                    |
| 9     | PEG-epoxy/L-COOH<br>(R = 1 : 2)                                             |                           |                           |                            |                           | 190°C<br>(15 min)                                             | [S8]                    |
| 10    | Se-EP/Oz-L (R = 1 : 1)                                                      |                           | 190°C<br>(60 min)         | 190°C<br>(5 min)           |                           |                                                               | [S9]                    |
| 11    | Eu-EP/SAs (R = 1 : 0.5)                                                     |                           | 200°C<br>(60 min)         | 190°C<br>(60 min)          | 160°C<br>(60 min)         | 160°C<br>(420 min)                                            | [S10]                   |
| 12    | EVS, EVC <sub>2</sub> S <sub>8</sub> and<br>EVC <sub>4</sub> S <sub>6</sub> |                           |                           |                            | 170°C<br>(10 min)         |                                                               | [S11]                   |
| 13    | ESO-FPA <sub>1.0</sub>                                                      |                           | 160°C<br>(30 min)         | 180°C<br>(30 min)          |                           | 140°C<br>(120 min)                                            | [S12]                   |
| 14    | CL-PE-310                                                                   | 160°C<br>(60 min)         | 160°C<br>(120 min)        | 180°C<br>(5 min)           | 160°C                     |                                                               | [S13]                   |
| 15    | EP-CA-40                                                                    |                           | 150°C<br>(120 min)        |                            | 170°C<br>(10 min)         |                                                               | [S14]                   |
| 16    | CS11 vitrimer                                                               |                           | 160°C<br>(60 min)         |                            |                           |                                                               | [S15]                   |
| 17    | CNT-vitrimer                                                                | 230°C<br>(3 min)          |                           | 180°C<br>(60 min)          |                           |                                                               | [S16]                   |
| 18    | ACAT-vitrimer                                                               | 200°C                     | 200°C                     | 180°C<br>(10 min)          | 200°C<br>(10 min)         |                                                               | [S17]                   |
| 19    | <b>DGEAC/SA/GL (V4)</b>                                                     | <b>130°C<br/>(60 min)</b> | <b>130°C<br/>(60 min)</b> | <b>130°C<br/>(120 min)</b> | <b>130°C<br/>(60 min)</b> | <b>130°C<br/>(300 min)</b>                                    | <b><i>This work</i></b> |

## References

- S1 K. Yu, Q. Shi, M. L. Dunn, T. Wang and H. J. Qi, *Adv. Funct. Mater.*, 2016, **26**, 6098–6106.
- S2 Q. Shi, K. Yu, M. L. Dunn, T. Wang and H. J. Qi, *Macromolecules*, 2016, **49**, 5527–5537.
- S3 Q. Shi, K. Yu, X. Kuang, X. Mu, C. K. Dunn, M. L. Dunn, T. Wang and H. J. Qi, *Mater. Horiz.*, 2017, **4**, 598-607.
- S4 J. Wu, X. Yu, H. Zhang, J. Guo, J. Hu and M.-H. Li, *ACS Sustainable Chem. Eng.*, 2020, **8**, 6479-6487.
- S5 H. Zhang, C. Cai, W. Liu, D. Li, J. Zhang, N. Zhao and J. Xu, *Sci. Rep.*, 2017, **7**, 11833.
- S6 T. Liu, C. Hao, S. Zhang, X. Yang, L. Wang, J. Han, Y. Li, J. Xin and J. Zhang, *Macromolecules*, 2018, **51**, 5577-5585.
- S7 J. Han, T. Liu, C. Hao, S. Zhang, B. Guo and J. Zhang, *Macromolecules*, 2018, **51**, 6789-6799.
- S8 C. Hao, T. Liu, S. Zhang, L. Brown, R. Li, J. Xin, T. Zhong, L. Jiang and J. Zhang, *ChemSusChem*, 2019, **12**, 1049-1058.
- S9 S. Zhang, T. Liu, C. Hao, L. Wang, J. Han, H. Liu and J. Zhang, *Green Chem.*, 2018, **20**, 2995-3000.
- S10 T. Liu, C. Hao, L. Wang, Y. Li, W. Liu, J. Xin and J. Zhang, *Macromolecules*, 2017, **50**, 8588-8597.
- S11 J. Chen, X. An, Y. Li, M. Wang and J. Zeng, *Chinese J. Polym. Sci.*, 2018, **36**, 641-648.
- S12 X. Yang, L. Guo, X. Xu, S. Shang and H. Liu, *Mater. Design*, 2020, **186**, 108248.
- S13 M. Hayashi, R. Yano and A. Takasu, *Polym. Chem.*, 2019, **10**, 2047-2056.
- S14 S. Mu, Y. Zhang, J. Zhou, B. Wang and Z. Wang, *ACS Sustainable Chem. Eng.*, 2020, **8**, 5296-5304.
- S15 F. I. Altuna, C. E. Hoppe and R. J. J. Williams, *RSC Adv.*, 2016, **6**, 88647–88655.
- S16 Y. Yang, Z. Pei, X. Zhang, L. Tao, Y. Wei and Y. Ji, *Chem. Sci.*, 2014, **5**, 3486-3492.
- S17 Q. Chen, X. Yu, Z. Pei, Y. Yang, Y. Wei and Y. Ji, *Chem. Sci.*, 2017, **8**, 724-733.
